# Supplementary material for: Are Hemoglobin Levels Elevated in Type 1 Diabetes?
Source: PubMed Central journal article supplement — Diabetes Care. 2009 Nov 16;33(2):341–3. doi: 10.2337/dc09-0713 (PMC2809278; doi:10.2337/dc09-0713), 2009-11-16

## Online Figure 1. Hemoglobin Levels by Age Group and Overt Nephropathy Status in Men and Women with Type 1 Diabetes

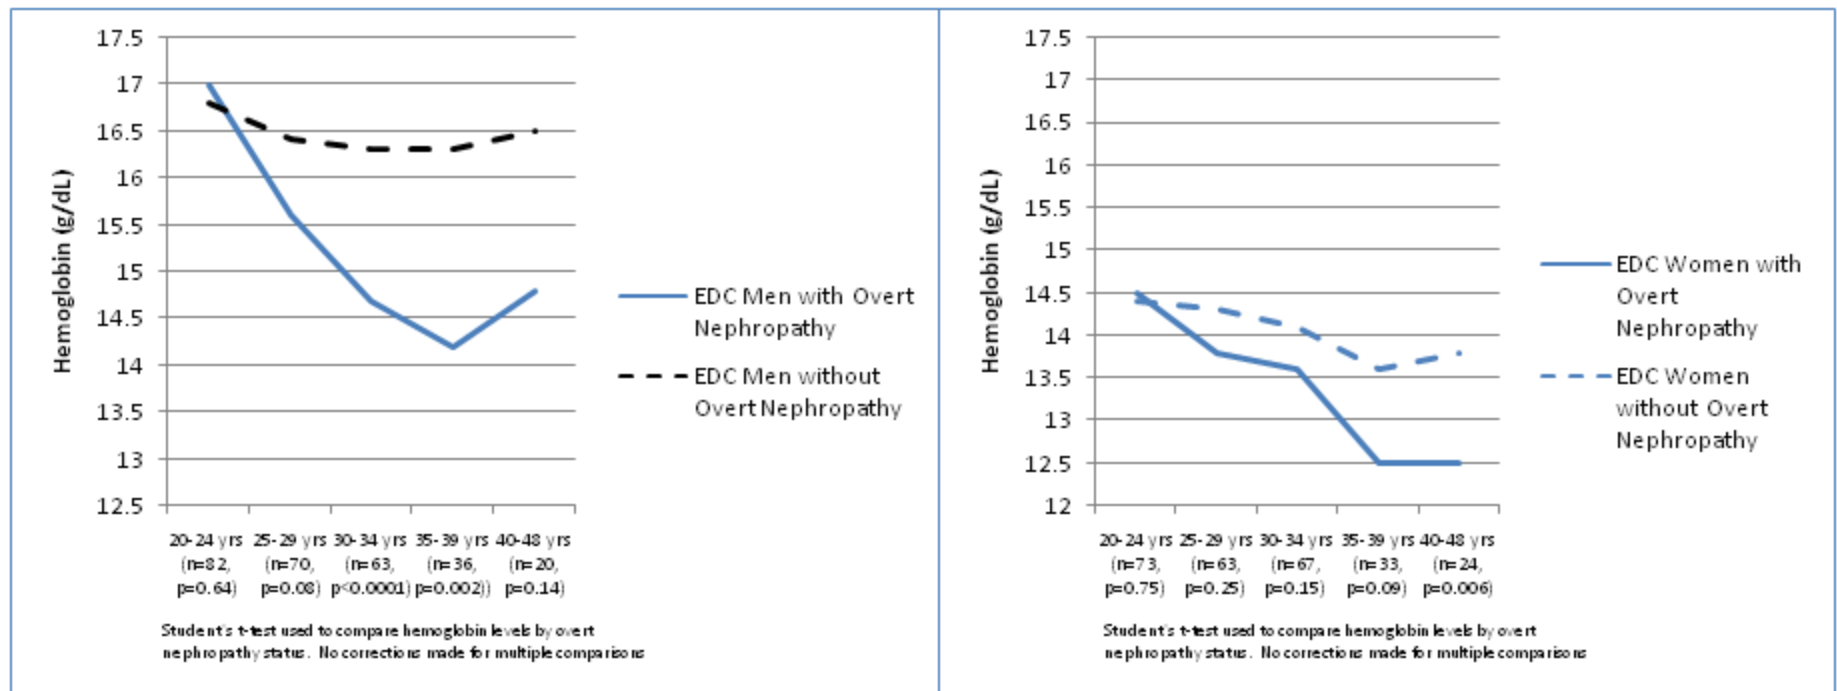

Supplement: supp_dc09-0713_dc09-0713_Online_appendix.pdf [file supp_dc09-0713_dc09-0713_Online_appendix.pdf]
